# Supplementary material for: Structural Basis of Stereospecificity in the Bacterial Enzymatic Cleavage of β-Aryl Ether Bonds in Lignin
Source: PubMed Central journal article supplement (PMC4777856; doi:10.1074/jbc.m115.694307), 2015-12-04

## **Structural basis of stereospecificity in the bacterial biodegradation of $\beta$ -aryl ether bonds found in lignin**

Kate E. Helmich<sup>1,2#</sup>, Jose Henrique Pereira<sup>3,4#</sup>, Daniel L. Gall<sup>2,5#</sup>, Richard A. Heins<sup>3,6</sup>, Ryan P. McAndrew<sup>3,4</sup>, Craig Bingman<sup>1</sup>, Kai Deng<sup>3,6</sup>, Keefe C. Holland<sup>3,6</sup>, Daniel R. Noguera<sup>2,5</sup>, Blake A. Simmons<sup>3,6</sup>, Kenneth L. Sale<sup>3,6</sup>, John Ralph<sup>1,2</sup>, Timothy J. Donohue<sup>2,7</sup>, Paul D. Adams<sup>3,4,8</sup>, George N. Phillips Jr.<sup>9</sup>

<sup>1</sup> Department of Biochemistry, University of Wisconsin, Madison, WI 53706

<sup>2</sup> U.S. Department of Energy Great Lakes Bioenergy Research Center, Wisconsin Energy Institute, University of Wisconsin, Madison, WI, 53726

<sup>3</sup> Joint BioEnergy Institute, Emeryville, CA 94608, USA

<sup>4</sup> Physical Biosciences Division, Lawrence Berkeley National Laboratory, Berkeley, CA 94720, USA

<sup>5</sup> Department of Civil & Environmental Engineering, University of Wisconsin, Madison, WI, 53706

<sup>6</sup> Biological and Engineering Sciences Center, Sandia National Laboratories, Livermore, CA, USA 94551 USA

<sup>7</sup> Department of Bacteriology, University of Wisconsin, Madison, WI, 53706

<sup>8</sup> Department of Bioengineering, University of California Berkeley, CA 94720, USA

<sup>9</sup> Department of Biochemistry and Cell Biology, Rice University, Houston, TX

#These authors contributed equally to this work.

\* Correspondence should be addressed to Timothy J. Donohue (email), George N. Phillips, Jr. ([georgep@rice.edu](mailto:georgep@rice.edu)) or Paul D. Adams ([pdadams@lbl.gov](mailto:pdadams@lbl.gov))

## SUPPLEMENTARY INFORMATION – CHEMICAL SYNTHESSES AND NMR DATA

### CHEMICAL SYNTHESSES:

**General.** Reagents and chemicals were purchased from Sigma-Aldrich.  $^1\text{H}$  and  $^{13}\text{C}$  NMR spectra were recorded on a Bruker Biospin (Billerica, MA) AVANCE 700 MHz spectrometer fitted with a cryogenically cooled 5-mm TXI gradient probe with inverse geometry (proton coils closest to the sample).  $^{19}\text{F}$  NMR spectra were recorded on a Bruker Biospin DMX 400 MHz spectrometer. Chemical shifts are reported in parts per million (ppm).  $J$  values are recorded in Hz. The central NMR solvent peaks were used as internal references ( $\delta_{\text{H}}$ : 2.05 ppm and  $\delta_{\text{C}}$ : 29.8 ppm for acetone- $d_6$ ;  $\delta_{\text{H}}$ : 4.79 ppm for (HDO in)  $\text{D}_2\text{O}$  (1,2). Carbon and proton assignments reported for all compounds in the attached spectra were determined via the aid of 2D COSY, HSQC, and HMBC NMR spectra. Merck-EMD Millipore aluminum-backed Silica Gel 60  $\text{F}_{254}$  normal-phase thin-layer chromatography plates were used for small-scale separation of organic compounds using a mixture of hexane and ethyl acetate as the mobile solvent.

Syntheses of  $\beta$ -(1'-formyl-3'-methoxyphenoxy)-acetoveratrone (FPAV, **Supplementary Figure 3**) and racemic  $\beta$ -(1'-formyl-3'-methoxyphenoxy)- $\gamma$ -hydroxypropioveratrone (FPHPV) were carried out as described previously (3,4) according to the method of Adler and Eriksoo (5,6). Biotage KP-Sil silica gel was used for preparative separations of organic compounds by flash chromatography using a CombiFlash  $\text{R}_f$  delivery module using a mixture of hexane and ethyl acetate as the mobile phase.

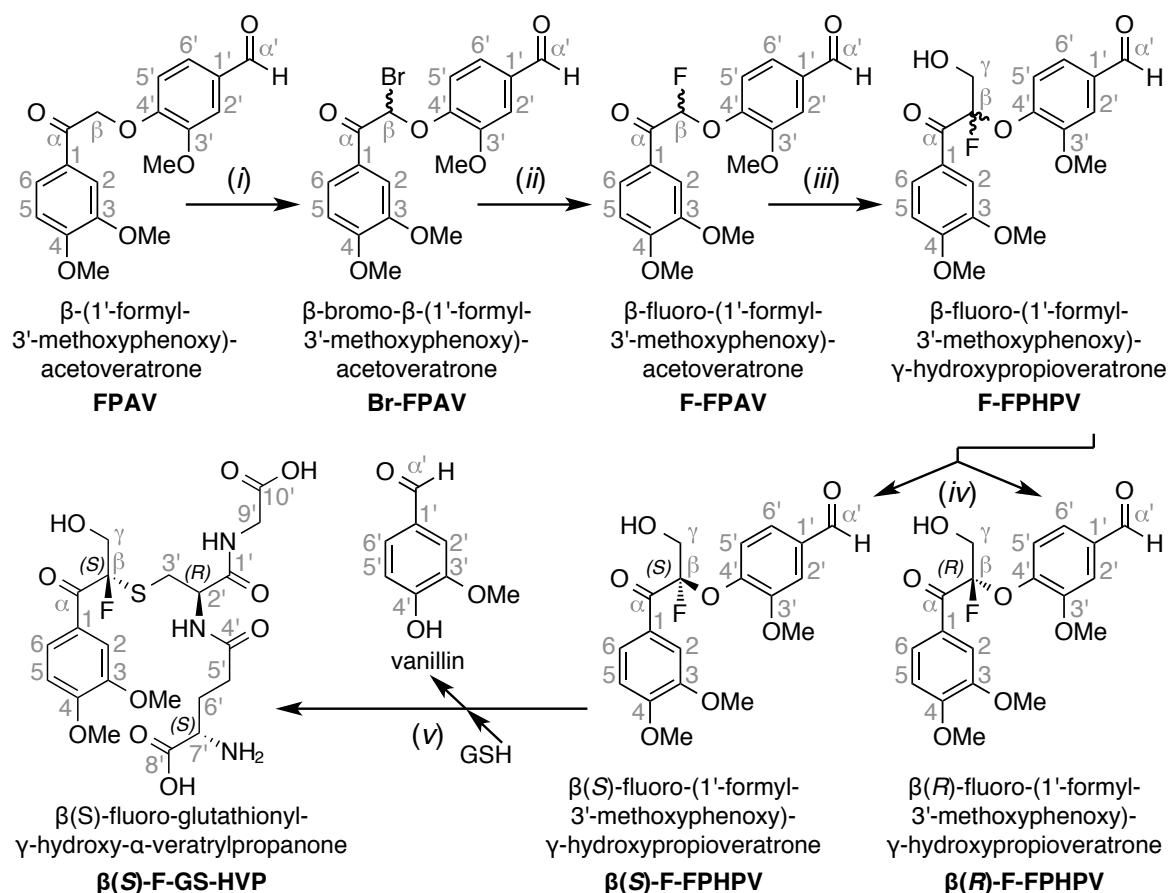

**Supplementary Figure 3.** Scheme for organic synthesis of (i) racemic  $\beta$ -bromo-(1'-formyl-3'-methoxyphenoxy)-acetoveratrone (Br-FPAV), (ii) racemic  $\beta$ -fluoro-(1'-formyl-3'-methoxyphenoxy)-acetoveratrone (F-FPAV), (iii) racemic  $\beta$ -fluoro-(1'-formyl-3'-methoxyphenoxy)- $\gamma$ -hydroxypropioveratrone (F-FPHPV), (iv) chiral chromatographic separation of enantiomers  $\beta(S)$ -F-FPHPV and  $\beta(R)$ -F-FPHPV, and (v) enzymatic synthesis of  $\beta(S)$ -fluoro-glutathionyl- $\gamma$ -hydroxy- $\alpha$ -veratrylpropanone ( $\beta(S)$ -F-GS-HVP). Reagents and conditions: (i) pyridinium tribromide, EtOAc, 90 min, 68%; (ii) Ag(I)F, acetonitrile, 18 h, 90%; (iii) formaldehyde, K<sub>2</sub>CO<sub>3</sub>, 1,4-dioxane, 18 h, 23%; (iv) chiral chromatography, ethanol/hexane; (v) LigE, glutathione, 25 mM Tris in H<sub>2</sub>O, pH 8.0, 18 h, C<sub>18</sub> chromatography, H<sub>2</sub>O/methanol.

**Synthesis of *racem*- $\beta$ -bromo-(1'-formyl-3'-methoxyphenoxy)-acetoveratrone (Br-FPAV), Supplementary Figure 8(i).** Synthetic FPAV served as the starting material in the synthesis of *racem*- $\beta$ -bromo-(1'-formyl-3'-methoxyphenoxy)-acetoveratrone (Br-FPAV, Supplementary Figure 8(i)). A solution of ethyl acetate (100 mL), FPAV (2.5 g, 7.6 mmol), and pyridinium tribromide (2.9 g, 9.1 mmol) was prepared in a 250-mL round-bottom flask with stirring. After 90 min, the reaction mixture was washed three times with saturated Na<sub>2</sub>CO<sub>3</sub>, once with H<sub>2</sub>O, and once with brine. The organic layer was then dried over MgSO<sub>4</sub> and the solvent was evaporated *in vacuo*, and the residual oil was identified as Br-FPAV (2.1 g, 68% yield).

***racem*- $\beta$ -bromo-(1'-formyl-3'-methoxyphenoxy)-acetoveratrone (Br-FPAV):**

<sup>1</sup>H NMR (700 MHz, acetone-*d*<sub>6</sub>)  $\delta$  10.00 (s, 1H, H $\alpha'$ ); 8.00 (dd, 1H,  $J_{6-5} = 8.5$  Hz,  $J_{6-2} = 2.0$  Hz, H6); 7.77 (d, 1H,  $J_{2-6} = 2.0$  Hz, H2); 7.68 (s, 1H, H $\beta$ ); 7.67 – 7.65 (m, 2H, H6'/H5'); 7.61 (d, 1H,  $J_{2'-6'} = 1.7$  Hz, H2'); 7.14 (d, 1H,  $J_{5'-6'} = 8.5$  Hz, H5); 3.97 (s, 3H, 3'-OMe); 3.95 (s, 3H, 4-OMe); 3.92 (s, 3H, 3-OMe).

<sup>13</sup>C NMR (176 MHz, acetone-*d*<sub>6</sub>)  $\delta$  191.7 (C $\alpha'$ ); 186.4 (C $\alpha$ ); 155.6 (C4); 152.2 (C3'); 150.2 (C3); 149.3 (C4'); 134.9 (C1'); 125.6 (C1); 125.4 (C6); 125.0 (C6'); 119.3 (C5'); 112.7 (C2); 112.3 (C2'); 111.6 (C5); 82.6 (C $\beta$ ); 56.6 (3'-OMe); 56.3 (4-OMe); 56.1 (3-OMe).

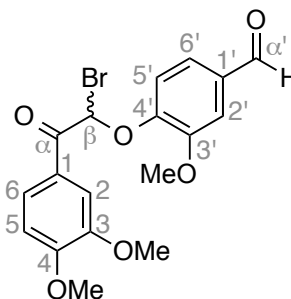

**Synthesis of *racem*- $\beta$ -fluoro-(1'-formyl-3'-methoxyphenoxy)-acetoveratrone (F-FPAV), Supplementary Figure 8(ii).** To a magnetically stirred solution of Br-FPAV (2.0 g, 5.0 mmol) dissolved in anhydrous acetonitrile (50 mL) in a 250-mL round-bottom flask maintained under an inert atmosphere at 60 °C, silver (I) fluoride (Ag(I)F) was added (3.2 g, 25.0 mmol). After 18 h, inorganics (7) were removed by filtration and the filtrate was evaporated *in vacuo*. The resulting residue was taken up with ethyl acetate and washed once with aqueous NH<sub>4</sub>Cl, three times with H<sub>2</sub>O, and once with brine. The organic layer was then dried over MgSO<sub>4</sub> and the solvent was again evaporated *in vacuo*. The product oil was further purified by flash chromatography using a mobile phase of Hexane/EtOAc = 1/1 (R<sub>f</sub> = 0.36). The product was then dissolved in hot ethyl acetate, hexane was added slowly and the mixture allowed to cool, affording crystalline *racem*- $\beta$ -fluoro-(1'-formyl-3'-methoxyphenoxy)-acetoveratrone (F-FPAV, 1.6 g, 90% yield).

***racem*- $\beta$ -fluoro-(1'-formyl-3'-methoxyphenoxy)-acetoveratrone (F-FPAV):**

$^1\text{H}$  NMR (700 MHz, acetone- $d_6$ )  $\delta$  9.99 (s, 1H, H $\alpha'$ ); 7.91 (dd, 1H,  $J_{6-5} = 8.5$  Hz,  $J_{6-2} = 1.8$  Hz, H6); 7.67 (d, 1H,  $J_{2-6} = 1.8$  Hz, H2); 7.63 (dd, 1H,  $J_{6'-5'} = 8.2$  Hz,  $J_{6'-2'} = 1.8$  Hz, H6'); 7.61 (d, 1H,  $J_{2'-6'} = 1.8$  Hz, H2'); 7.55 (d, 1H,  $J_{5-6} = 8.2$  Hz, H5'); 7.15 (d, 1H,  $J_{5'-6'} = 8.5$  Hz, H5'); 6.88 (d, 1H,  $J_{\beta\text{-BF}} = 59.6$  Hz, H $\beta$ ); 3.96 (s, 3H, 3'-OMe); 3.94 (s, 3H, 4-OMe); 3.90 (s, 3H, 3-OMe).

$^{13}\text{C}$  NMR (176 MHz, acetone- $d_6$ )  $\delta$  191.6 (C $\alpha'$ ); 187.4 (d,  $J_{\alpha\text{-}\beta\text{F}} = 25.7$  Hz, C $\alpha$ ); 155.8 (C4); 151.8 (C3'); 150.3 (C3); 150.1 (C4'); 134.8 (C1'); 126.4 (C1); 125.7 (C6); 125.2 (C6'); 119.5 (C5'); 112.3 (C2'); 112.2 (C2); 111.6 (C5); 106.1 (d,  $J_{\beta\text{-}\beta\text{F}} = 232.9$  Hz, C $\beta$ ); 56.5 (3'-OMe); 56.3 (4-OMe); 56.1 (3-OMe).

$^{19}\text{F}$  NMR (376.5 MHz, acetone- $d_6$ )  $\delta$  -132.3 (d,  $J_{\beta\text{F-}\beta\text{H}} = 59.6$  Hz, F $\beta$ ).

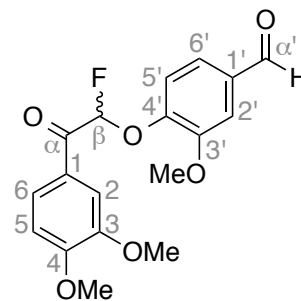

**Synthesis of *racem*- $\beta$ -fluoro-(1'-formyl-3'-methoxyphenoxy)- $\gamma$ -hydroxypropioveratrone (F-FPHPV) racemate, Supplementary Figure 8 (iii–iv).** To a magnetically stirred solution of 1,4-dioxane (40 mL), F-FPAV (0.8 g, 2.3 mmol), and formaldehyde (136 mg, 4.5 mmol, 340  $\mu\text{L}$  of 37% formaldehyde in  $\text{H}_2\text{O}$ ) in a 100-mL round-bottom flask, anhydrous  $\text{K}_2\text{CO}_3$  (0.4 g, 22.7 mmol) was added and the reaction was set to 60  $^\circ\text{C}$ . After 18 h, the reaction was cooled to room temperature, carbonates were removed by filtration, and 1,4-dioxane was evaporated *in vacuo*. The product was dissolved in ethyl acetate and washed three times with  $\text{H}_2\text{O}$  and once with brine. The organic layer was dried over  $\text{MgSO}_4$  and the solvent evaporated *in vacuo*. The residue was further purified by flash chromatography using a mobile phase of Hexane/EtOAc = 1/3 ( $R_f = 0.19$ ). Racemic  $\beta$ -fluoro-(1'-formyl-3'-methoxyphenoxy)- $\gamma$ -hydroxypropioveratrone (F-FPHPV) was recovered from chromatographic fractions as an oil (0.2 g, 23% yield).

The chiral enantiomers of racemate F-FPHPV (*i.e.*,  $\beta(S)$ -F-FPHPV and  $\beta(R)$ -F-FPHPV) were purified via chiral chromatography where racemic F-FPHPV (5 mg, 13.2  $\mu\text{mol}$ ) was dissolved in ethanol (5 mL) and injected into a Beckman 125NM solvent module HPLC system equipped with a Diacel Chemical Industries CHIRALPAK AY-H column (10 by 250 mm) and Beckman 168 UV detector. A mixture of ethanol and hexane was used as the mobile phase at a flow rate of 2.0 mL  $\text{min}^{-1}$ . The ethanol fraction of the total flow (with hexane as the remainder) was adjusted over a gradient as follows: 0–10 min, 10% ethanol; 10–60 min, gradient from 10–40% ethanol; 60–71 min, 40% ethanol; 71–72 min, gradient from 40–10% ethanol; 72–80 min, 10% ethanol.  $\beta(S)$ -F-FPHPV and  $\beta(R)$ -F-FPHPV eluted from the column after retention times ( $t_R$ ) of 46.1 min ( $R_f = 0.42$ ) and 53.9 min ( $R_f = 0.36$ ), respectively, and their fractions were collected, pooled, and solvents were dried *in vacuo*.

***racem*- $\beta$ -fluoro-(1'-formyl-3'-methoxyphenoxy)- $\gamma$ -hydroxypropioveratrone (F-FPHPV):**

$^1\text{H}$  NMR (700 MHz, acetone- $d_6$ )  $\delta$  9.85 (s, 1H, H $\alpha'$ ); 7.93 (dd, 1H,  $J_{6-5} = 8.6$  Hz,  $J_{6-2} = 2.0$  Hz, H6); 7.64 (d, 1H,  $J_{2-6} = 2.0$  Hz, H2); 7.48 (d, 1H,  $J_{2'-6'} = 1.8$  Hz, H2'); 7.41 (dd, 1H,  $J_{6'-5'} = 8.3$  Hz,  $J_{6'-2'} = 1.8$  Hz, H6'); 7.28 (d, 1H,  $J_{5-6} = 8.3$  Hz, H5'); 7.04 (d, 1H,  $J_{5'-6'} = 8.6$  Hz, H5'); 4.81 (dd, 1H,  $J_{\gamma\text{OH-}\gamma\text{a}} = 7.6$  Hz,  $J_{\gamma\text{OH-}\gamma\text{b}} = 6.0$  Hz,  $\gamma$ -OH); 4.27 (ddd, 1H,  $J_{\gamma\text{a-}\beta\text{F}} = 23.2$  Hz,  $J_{\gamma\text{a-}\gamma\text{b}} = 12.4$  Hz,  $J_{\gamma\text{a-}\gamma\text{OH}} = 7.6$  Hz, H $\gamma\text{a}$ ); 4.19 (ddd, 1H,  $J_{\gamma\text{b-}\beta\text{F}} = 12.5$  Hz,  $J_{\gamma\text{b-}\gamma\text{a}} = 12.4$  Hz,  $J_{\gamma\text{b-}\gamma\text{OH}} = 6.1$  Hz, H $\gamma\text{b}$ ); 3.97 (s, 3H, 3'-OMe); 3.89 (s, 3H, 4-OMe); 3.85 (s, 3H, 3-OMe).

$^{13}\text{C}$  NMR (176 MHz, acetone- $d_6$ )  $\delta$  191.4 (C $\alpha'$ ); 190.3 (d,  $J_{\alpha\text{-}\beta\text{F}} = 27.6$  Hz, C $\alpha$ ); 155.3 (C4); 151.6 (C3'); 149.8 (C3); 148.7 (C4'); 134.0 (C1'); 127.2 (C1); 125.6 (C6); 125.1 (C6'); 119.3 (C5'); 114.3 (d,  $J_{\beta\text{-}\beta\text{F}} = 241.8$  Hz, C $\beta$ ); 112.8 (C2); 111.8 (C2'); 111.4 (C5); 66.2 (d,  $J_{\gamma\text{-}\beta\text{F}} = 28.5$  Hz C $\gamma$ ); 56.4 (3'-OMe); 56.2 (4-OMe); 56.0 (3-OMe).

$^{19}\text{F}$  NMR (376.5 MHz, acetone- $d_6$ )  $\delta$  -117.7 (dd,  $J_{\beta\text{F-}\gamma\text{Ha}} = 23.2$  Hz,  $J_{\beta\text{F-}\gamma\text{Hb}} = 12.5$  Hz, F $\beta$ ).

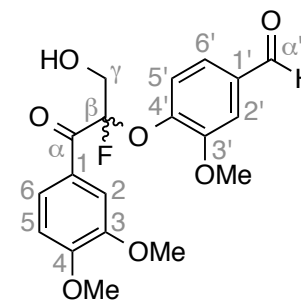

**Enzymatic synthesis of  $\beta(S)$ -fluoro-glutathionyl- $\gamma$ -hydroxy- $\alpha$ -veratrylpropanone ( $\beta(S)$ -F-GS-HVP), Supplementary Figure 8(v).** *In vitro* enzymatic synthesis with  $\beta$ -etherase LigE ( $360 \mu\text{g mL}^{-1}$ ) as a catalyst was conducted in 4 mL of an aqueous assay buffer [1.5 mM  $\beta(S)$ -F-FPHPV, 25 mM Tris, 2.5% DMSO, 5 mM glutathione (GSH), pH 8.0]. Reagents were added as follows: 2.3 mg  $\beta(S)$ -F-FPHPV, 100  $\mu\text{L}$  DMSO, 3500  $\mu\text{L}$  of 25.6 mM Tris (pH 9.0), 200  $\mu\text{L}$  of 100 mM GSH in 25.6 mM Tris, 200  $\mu\text{L}$  of a  $7.2 \mu\text{g mL}^{-1}$  stock of LigE. Prior to addition of LigE, the pH of the assay mixture was measured at pH 8.0 using pH paper. After 18 h, the 4 mL reaction was filtered through a 10,000 MWCO filter for the removal of protein and six ethyl acetate extractions were conducted for the removal of vanillin and residual  $\beta(S)$ -F-FPHPV. The aqueous fraction was then loaded onto a pre-packed Biotage KP-C<sub>18</sub> (100 g) reversed phase column using a Beckman 125NM solvent delivery module equipped with a Beckman 168 UV detector. A mixture of water and methanol was used for the mobile phase at a flow rate of 10 mL/min. The proportions of the total flow made up by each buffer were adjusted over a gradient: 0–15 min, 0% methanol; 15–20 min, gradient from 0-100% methanol; 20–35 min, 100% methanol; 35–40 min, gradient from 100-0% methanol; 40–50 min, 0% methanol. After elution of the perceived GSH-conjugated reaction product ( $t_R = 31.0$  min), fractions with UV absorption at 280 nm were collected, pooled, dried over a gentle stream of nitrogen gas overnight, and then analyzed by NMR. The <sup>1</sup>H, COSY, HSQC, and HMBC NMR spectra of the isolated product from the LigE-catalyzed reaction were consistent with the identity of  $\beta(S)$ -fluoro-glutathionyl- $\gamma$ -hydroxy- $\alpha$ -veratrylpropanone ( $\beta(S)$ -F-GS-HVP, Figure S8A). Because  $\beta(S)$ -F-GS-HVP was recovered from the reaction in low quantity, a <sup>13</sup>C NMR spectrum could not be obtained directly. Rather, the <sup>13</sup>C NMR spectral data reported was determined from the <sup>1</sup>H, COSY, HSQC, and HMBC NMR spectra.

**$\beta(S)$ -fluoro-glutathionyl- $\gamma$ -hydroxy- $\alpha$ -veratrylpropanone ( $\beta(S)$ -F-GS-HVP), from LigE:**

<sup>1</sup>H NMR (700 MHz, D<sub>2</sub>O)  $\delta$  7.89 (dd, 1H,  $J_{6-5} = 8.6$  Hz,  $J_{6-2} = 2.0$  Hz, H6); 7.59 (d, 1H,  $J_{2-6} = 2.0$  Hz, H2); 7.01 (d, 1H,  $J_{5-6} = 8.6$  Hz, H5); 4.47 (dd, 1H,  $J_{2'-3b'} = 8.1$  Hz,  $J_{2'-3a'} = 4.9$  Hz, H2'); 4.21 (dd, 1H,  $J_{\gamma a-\beta F} = 27.3$  Hz,  $J_{\gamma a-\gamma b} = 13.2$  Hz, H $\gamma_a$ ); 4.07 (dd, 1H,  $J_{\gamma b-\beta F} = 15.8$  Hz,  $J_{\gamma b-\gamma a} = 13.2$  Hz, H $\gamma_b$ ); 3.84 (s, 3H, 4-OMe); 3.80 (s, 3H, 3-OMe); 3.62 (d, 1H,  $J_{9a'-9b'} = 17.2$  Hz, H9'a); 3.60 (t, 1H,  $J_{7'-6'} = 6.3$  Hz, H7'); 3.48 (d, 1H,  $J_{9b'-9a'} = 17.2$  Hz, H9'b); 3.05 (dd, 1H,  $J_{3a'-3b'} = 14.1$  Hz,  $J_{3a'-2'} = 4.9$  Hz, H3'a); 2.90 (dd, 1H,  $J_{3b'-3a'} = 14.1$  Hz,  $J_{3b'-2'} = 8.1$  Hz, H3'b); 2.34 – 2.28 (m, 2H, H5'a/b); 2.00 – 1.94 (m, 2H, H6'a/b).

<sup>13</sup>C NMR (176 MHz, D<sub>2</sub>O)  $\delta$  194.1 (d,  $J_{\gamma-\beta F} = \sim 25$  Hz, C $\alpha$ ); 176.1 (C10'); 175.2 (C4'); 174.6 (C8'); 171.5 (C1'); 154.0 (C4); 148.3 (C3); 127.0 (C1); 126.0 (C6); 112.6 (C2); 111.0 (C5); 107.7 (d,  $J_{\beta-\beta F} = \sim 240$  Hz, C $\beta$ ); 65.7 (d,  $J_{\gamma-\beta F} = \sim 25$  Hz, C $\gamma$ ); 56.0 (4-OMe); 55.9 (3-OMe); 54.1 (C7'); 53.0 (C2'); 43.2 (C9'); 31.4 (C5'); 30.2 (C3'); 26.1 (C6').

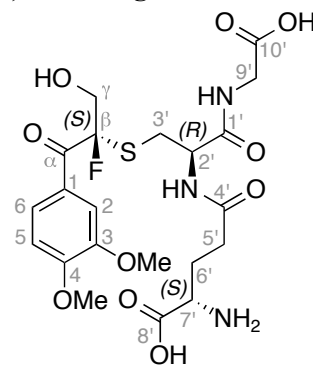

**Enzymatic synthesis of  $\beta(S)$ -glutathionyl- $\gamma$ -hydroxy- $\alpha$ -veratrylpropanone ( $\beta(S)$ -GS-HVP).** With  $\beta(R)$ -F-FPHPV used as the reaction substrate, rather than  $\beta(S)$ -F-FPHPV, the same procedure was used to isolate the product  $\beta(S)$ -GS-HVP from a LigE-catalyzed reaction, as previously described (3).

**$\beta$ (S)-glutathionyl- $\gamma$ -hydroxy- $\alpha$ -veratrylpropanone ( $\beta$ (S)-GS-HVP), from LigE:**

$^1\text{H}$  NMR (700 MHz,  $\text{D}_2\text{O}$ )  $\delta$  7.68 (dd, 1H,  $J_{6-5} = 8.4$  Hz,  $J_{6-2} = 2.0$  Hz, H6); 7.48 (d, 1H,  $J_{2-6} = 2.0$  Hz, H2); 7.02 (d, 1H,  $J_{5-6} = 8.4$  Hz, H5); 4.54 (dd, 1H,  $J_{\beta-\gamma_a} = 7.9$ ,  $J_{\beta-\gamma_b} = 5.9$  Hz, H $\beta$ ); 4.27 (dd, 1H,  $J_{2'-3b'} = 8.8$  Hz,  $J_{2'-3a'} = 5.1$  Hz, H2'); 3.98 (dd, 1H,  $J_{\gamma_a-\gamma_b} = 11.6$  Hz,  $J_{\gamma_a-\beta} = 7.9$  Hz, H $\gamma_a$ ); 3.84 (s, 3H, 4-OMe); 3.83 - 3.78 (m, 1H, H $\gamma_b$ ); 3.80 (s, 3H, 3-OMe); 3.57 (d, 1H,  $J_{9a'-9b'} = 17.3$  Hz, H9'a); 3.50 (d, 1H,  $J_{9b'-9a'} = 17.3$  Hz, H9'b); 3.49 (t, 1H,  $J_{7'-6'} = 6.4$  Hz, H7'); 2.94 (dd, 1H,  $J_{3a'-3b'} = 14.2$  Hz,  $J_{3a'-2'} = 5.1$  Hz, H3'a); 2.77 (dd, 1H,  $J_{3b'-3a'} = 14.2$  Hz,  $J_{3b'-2'} = 8.8$  Hz, H3'b); 2.26 - 2.16 (m, 2H, H5'a/b); 1.90 - 1.80 (m, 2H, H6'a/b).

$^{13}\text{C}$  NMR (176 MHz,  $\text{D}_2\text{O}$ )  $\delta$  198.4 (C $\alpha$ ); 176.8 (C10'); 175.5 (C4'); 175.4 (C8'); 172.1 (C1'); 154.4 (C4); 149.0 (C3); 128.9 (C1); 125.3 (C6); 111.8 (C2); 111.8 (C5); 61.6 (C $\gamma$ ); 56.7 (4-OMe); 56.5 (3-OMe); 54.9 (C7'); 53.8 (C2'); 48.6 (C $\beta$ ); 44.0 (C9'); 32.2 (C5'); 32.1 (C3'); 27.3 (C6').

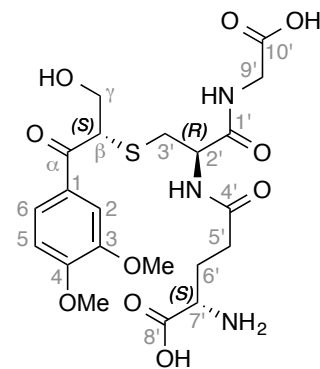

## SUPPLEMENTARY REFERENCES

1. Gottlieb, H. E., Kotlyar, V., and Nudelman, A. (1997) NMR chemical shifts of common laboratory solvents as trace impurities. *Journal of Organic Chemistry* **62**, 7512-7515.
2. Fulmer, G. R., Miller, A. J. M., Sherden, N. H., Gottlieb, H. E., Nudelman, A., Stoltz, B. M., Bercaw, J. E., and Goldberg, K. I. (2010) NMR chemical shifts of trace impurities: Common laboratory solvents, organics, and gases in deuterated solvents relevant to the organometallic chemist. *Organometallics* **29**, 2176-2179.
3. Gall, D. L., Kim, H., Lu, F., Donohue, T. J., Noguera, D. R., and Ralph, J. (2014) Stereochemical features of glutathione-dependent enzymes in the *Sphingobium* sp. strain SYK-6  $\beta$ -aryl etherase pathway. *J Biol Chem* **289**, 8656-8667.
4. Gall, D. L., Ralph, J., Donohue, T. J., and Noguera, D. R. (2014) A group of sequence-related sphingomonad enzymes catalyzes cleavage of  $\beta$ -aryl ether linkages in lignin  $\beta$ -guaiacyl and  $\beta$ -syringyl ether dimers. *Environmental science & technology* **48**, 12454-12463.
5. Adler, E., and Eriksoo, E. (1955) Guaiacylglycerol and its  $\beta$ -guaiacyl ether. *Acta chemica Scandinavica* **9**, 341-342.
6. Landucci, L. L., Geddes, S. A., and Kirk, T. K. (1981) Synthesis of C-14-labeled 3-methoxy-4-hydroxy- $\alpha$ -(2-methoxyphenoxy)- $\beta$ -hydroxypropiofenone, a lignin model-compound. *Holzforschung* **35**, 67-70.
7. Padmakshan, D., Bennett, S. A., Otting, G., and Easton, C. J. (2007) Stereocontrolled synthesis of (S)- $\gamma$ -fluoroleucine. *Synlett*, 1083-1084.

## SUPPLEMENTARY INFORMATION - <sup>1</sup>H AND <sup>13</sup>C NMR SPECTRA OF MODEL COMPOUNDS AND REACTION PRODUCTS

| COMPOUND:                                                                                       | Source: <sup>a</sup> | Spectrum:       | Solvent: <sup>b</sup>          | Page: |
|-------------------------------------------------------------------------------------------------|----------------------|-----------------|--------------------------------|-------|
| <i>racem</i> -β-bromo-(1'-formyl-3'-methoxyphenoxy)-acetoveratrone<br>(Br-FPAV)                 | synthetic            | <sup>1</sup> H  | acetone- <i>d</i> <sub>6</sub> | S-18  |
|                                                                                                 |                      | <sup>13</sup> C | acetone- <i>d</i> <sub>6</sub> | S-19  |
| <i>racem</i> -β-fluoro-(1'-formyl-3'-methoxyphenoxy)-acetoveratrone<br>(F-FPAV)                 | synthetic            | <sup>1</sup> H  | acetone- <i>d</i> <sub>6</sub> | S-20  |
|                                                                                                 |                      | <sup>13</sup> C | acetone- <i>d</i> <sub>6</sub> | S-21  |
|                                                                                                 |                      | <sup>19</sup> F | acetone- <i>d</i> <sub>6</sub> | S-22  |
| <i>racem</i> -β-fluoro-(1'-formyl-3'-methoxyphenoxy)-γ-hydroxypropio-<br>veratrone<br>(F-FPHPV) | synthetic            | <sup>1</sup> H  | acetone- <i>d</i> <sub>6</sub> | S-23  |
|                                                                                                 |                      | <sup>13</sup> C | acetone- <i>d</i> <sub>6</sub> | S-24  |
|                                                                                                 |                      | <sup>19</sup> F | acetone- <i>d</i> <sub>6</sub> | S-25  |
| β( <i>S</i> )-fluoro-glutathionyl-γ-hydroxy-α-veratrylpropanone<br>(β( <i>S</i> )-F-GS-HVP)     | LigE                 | <sup>1</sup> H  | D <sub>2</sub> O               | S-26  |
| β( <i>S</i> )-glutathionyl-γ-hydroxy-α-veratrylpropanone<br>(β( <i>S</i> )-GS-HVP)              | LigE                 | <sup>1</sup> H  | D <sub>2</sub> O               | S-27  |
|                                                                                                 |                      | <sup>13</sup> C | D <sub>2</sub> O               | S-28  |

<sup>a</sup> Compounds were obtained either via organic synthesis or from LigE β-etherase-catalyzed reaction products.

<sup>b</sup> <sup>1</sup>H, <sup>13</sup>C, and <sup>19</sup>F NMR spectra were analyzed in either acetone-*d*<sub>6</sub> or D<sub>2</sub>O as NMR solvents.

***racem*- $\beta$ -bromo-(1'-formyl-3'-methoxyphenoxy)-acetoveratrone (Br-FPAV)**

$^1\text{H}$  NMR (700 MHz, acetone- $d_6$ )

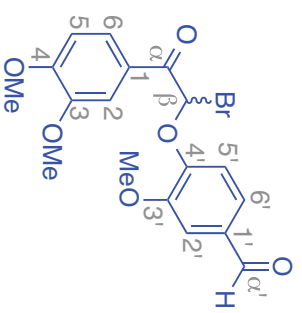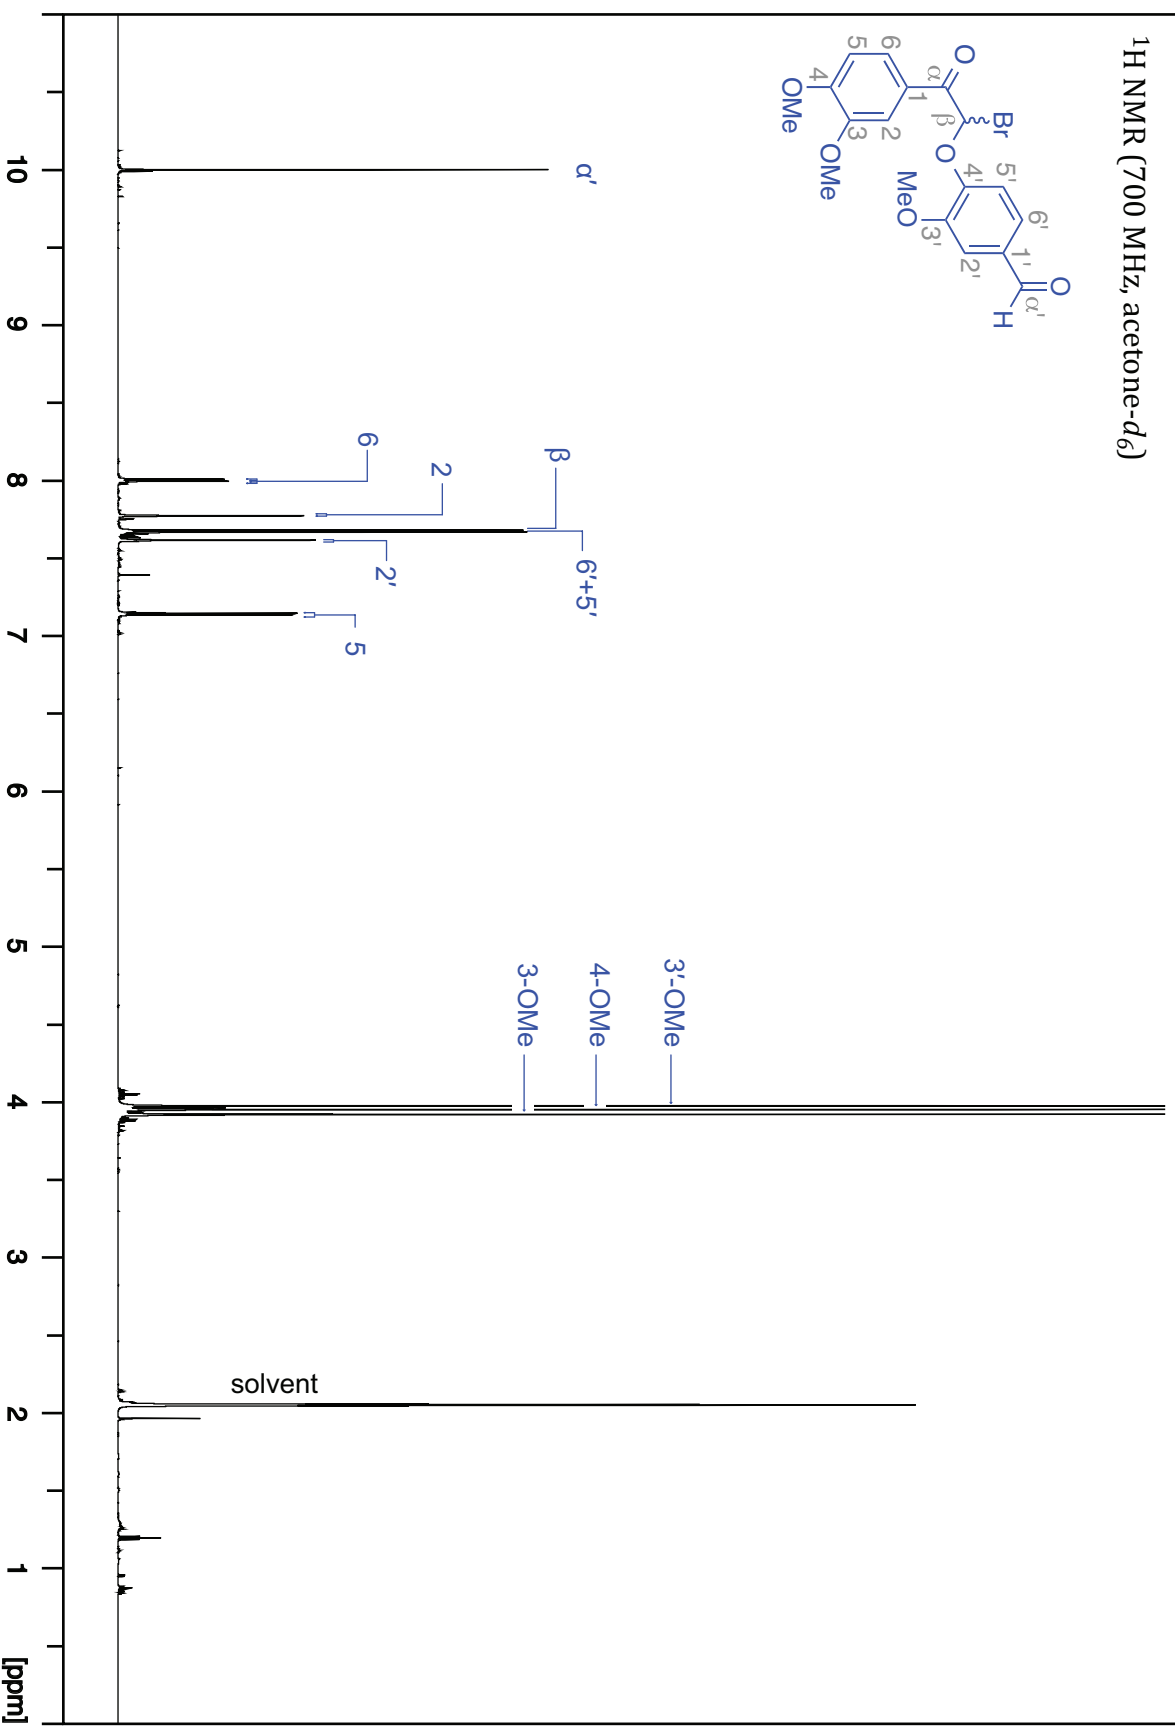



***racem*- $\beta$ -bromo-(1'-formyl-3'-methoxyphenoxy)-acetoveratrone (Br-FPAV)**

$^{13}\text{C}$  NMR (176 MHz, acetone- $d_6$ )

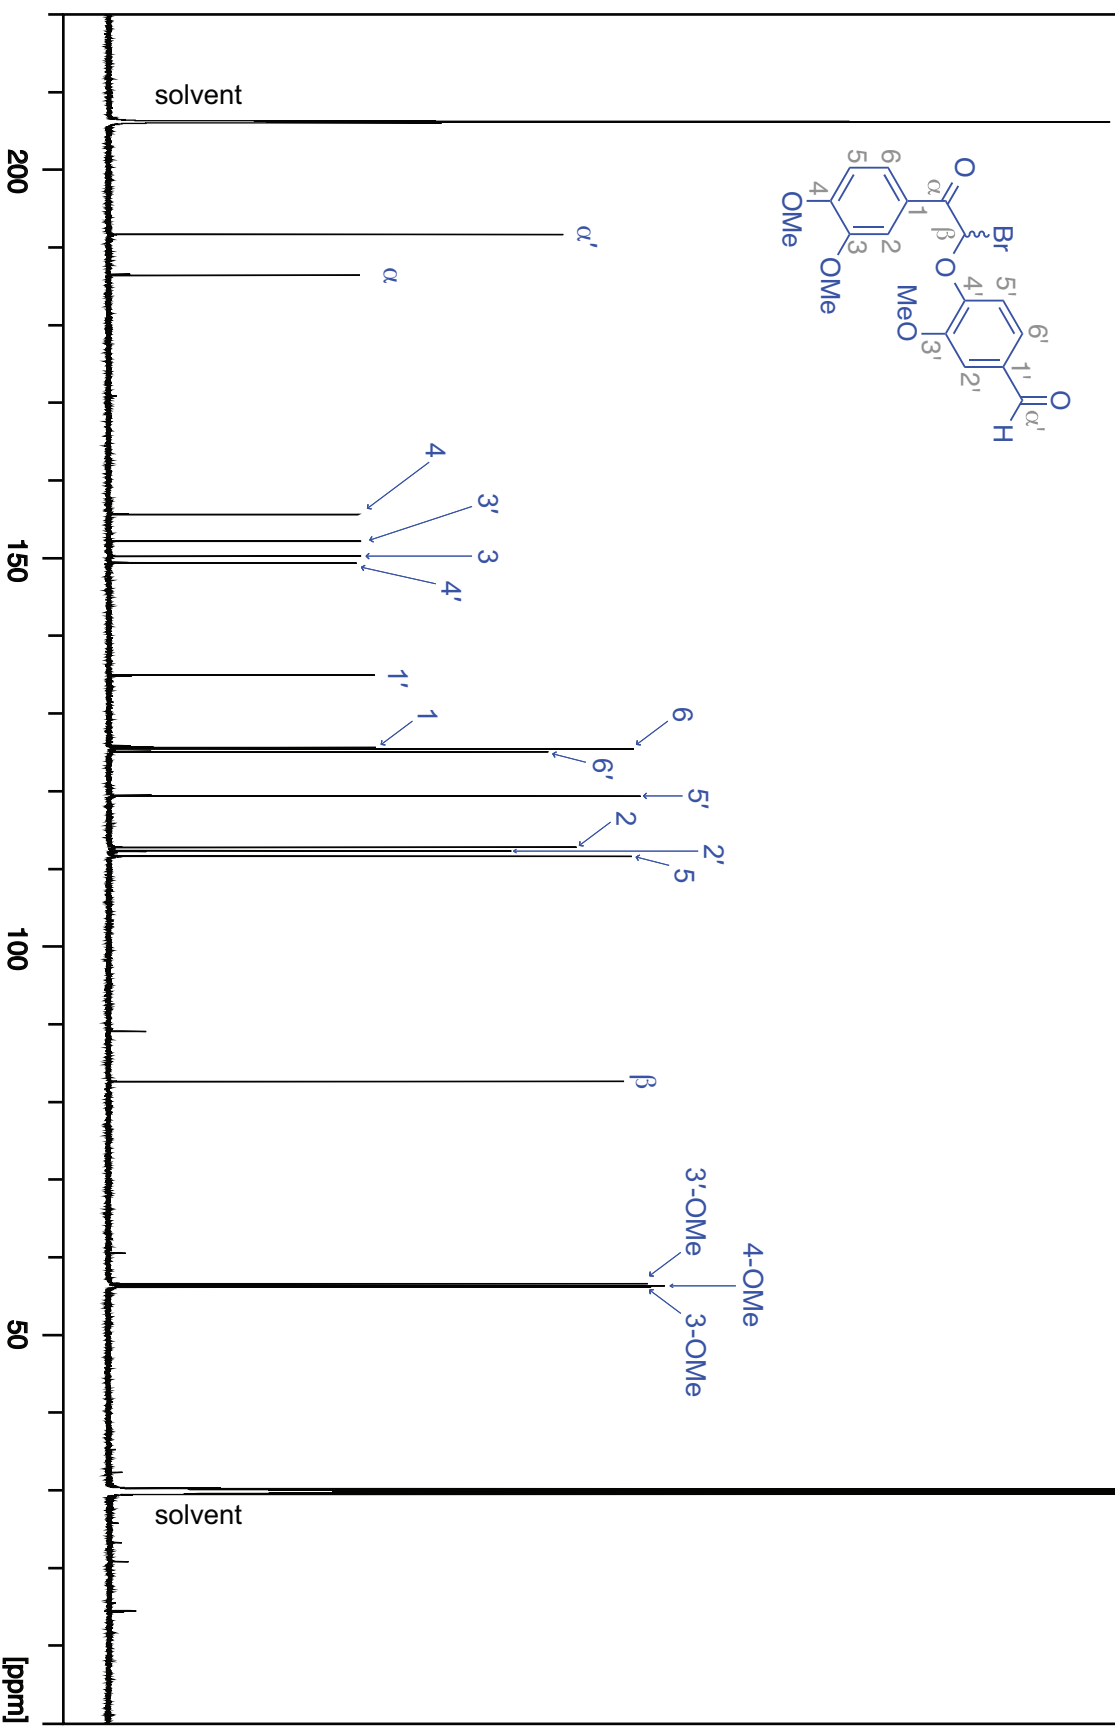

**racem- $\beta$ -fluoro-(1'-formyl-3'-methoxyphenoxy)-acetoveratrone (F-FPAV)**

$^1\text{H}$  NMR (700 MHz, acetone- $d_6$ )

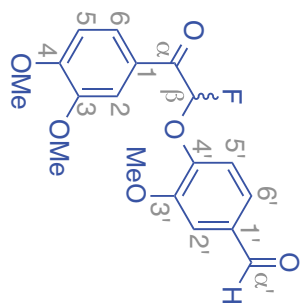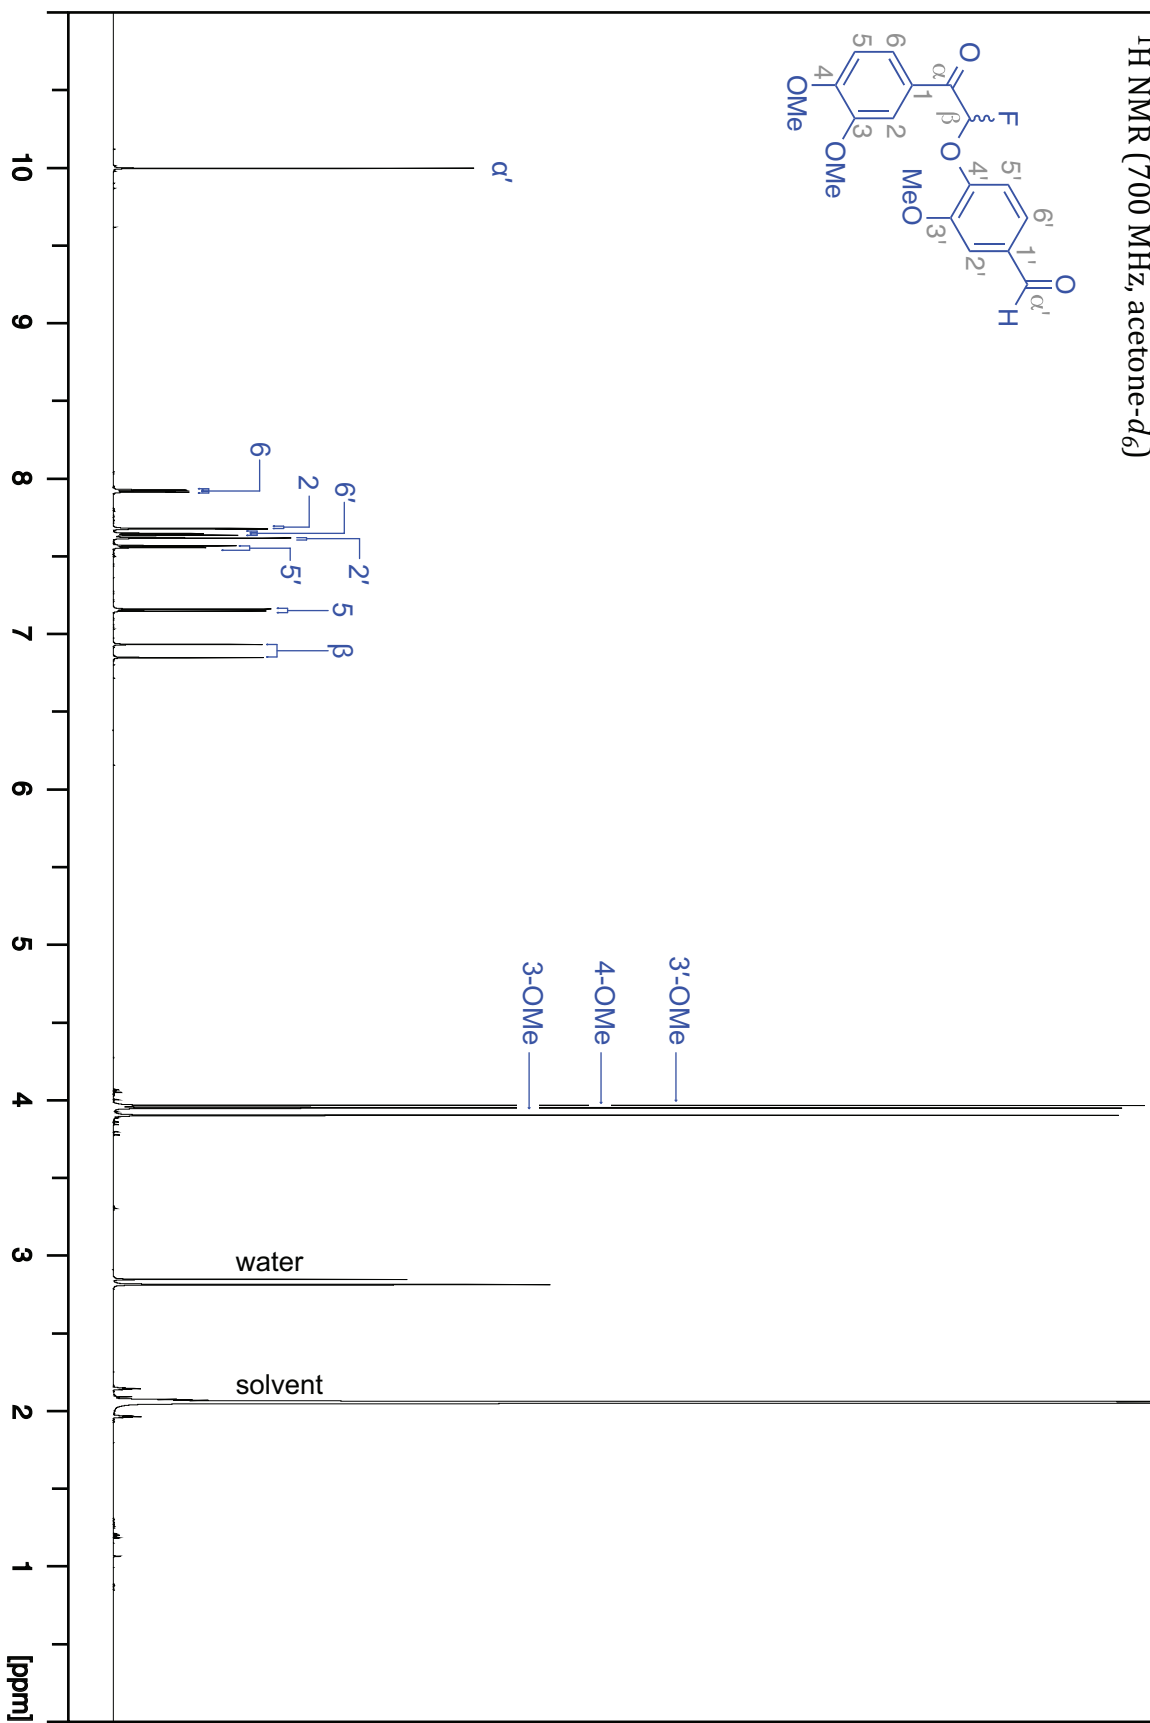

***racem*- $\beta$ -fluoro-(1'-formyl-3'-methoxyphenoxy)-acetoveratrone (F-FPAV)**

$^{13}\text{C}$  NMR (176 MHz, acetone- $d_6$ )

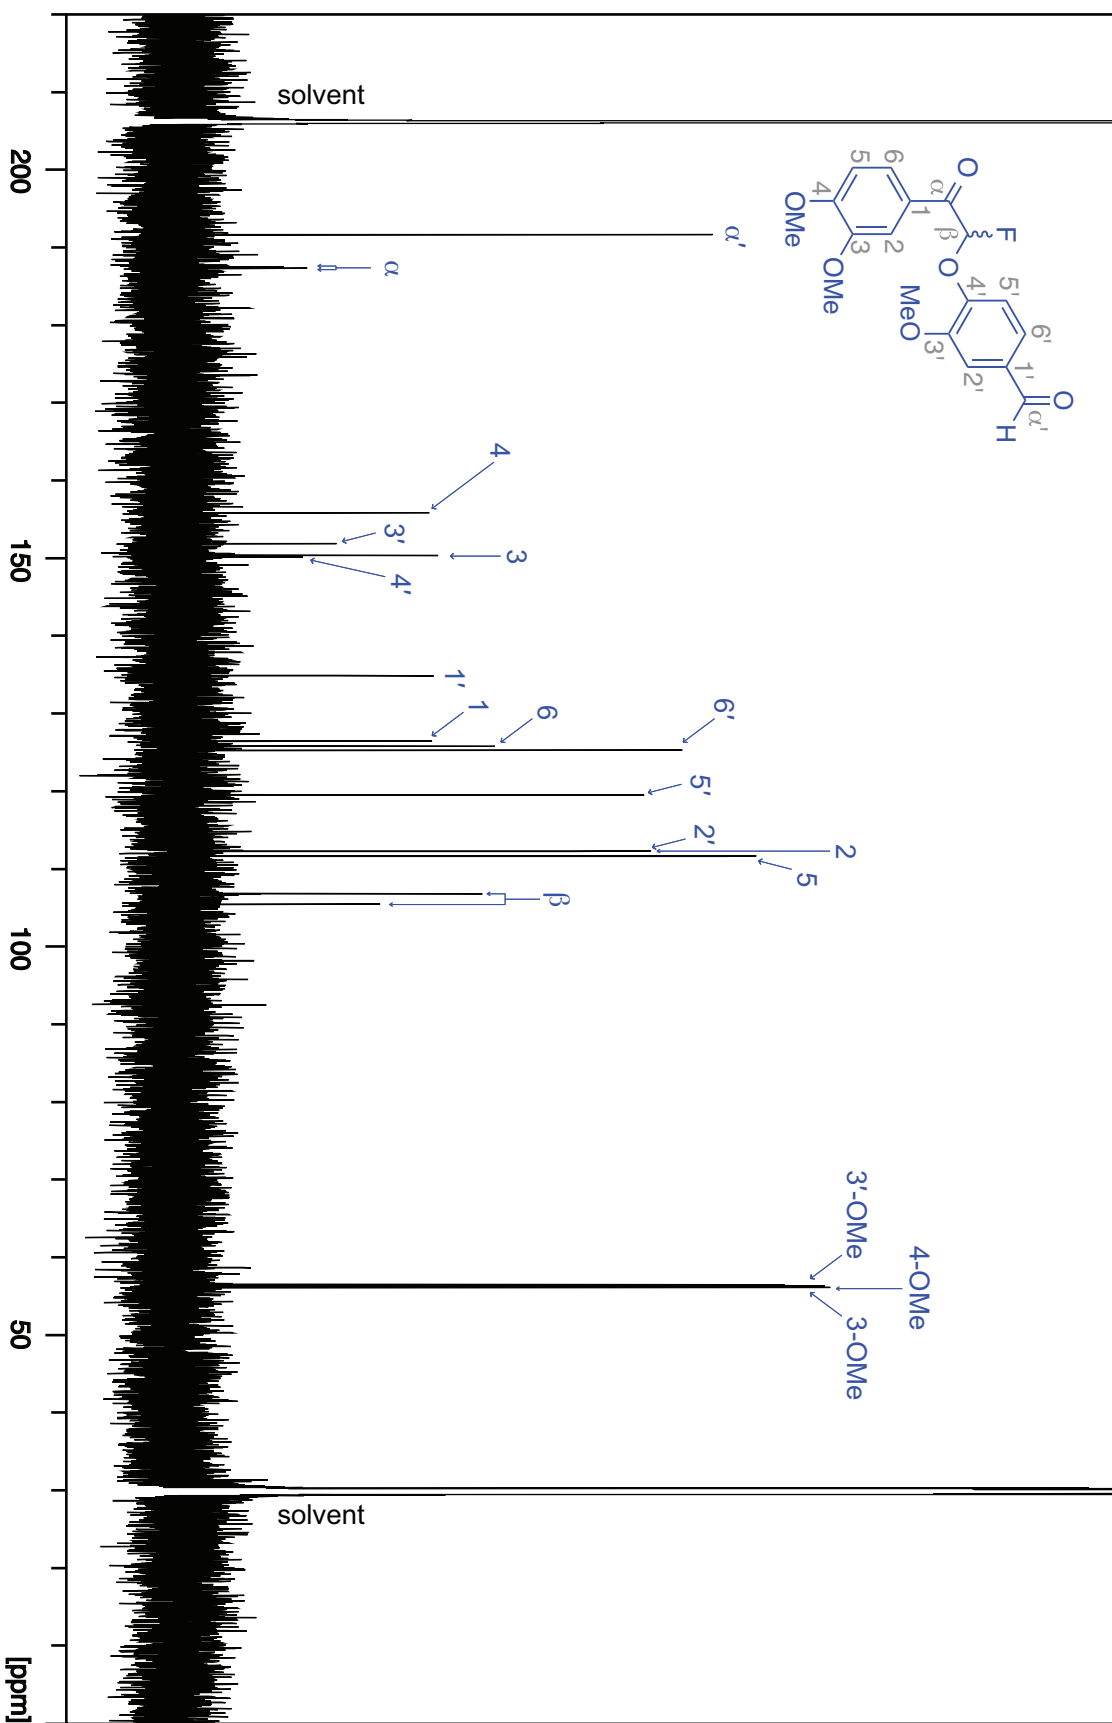

***racem*- $\beta$ -fluoro-(1'-formyl-3'-methoxyphenoxy)-acetoveratrone (F-FPAV)**

$^{19}\text{F}$  NMR (376 MHz, acetone- $d_6$ )

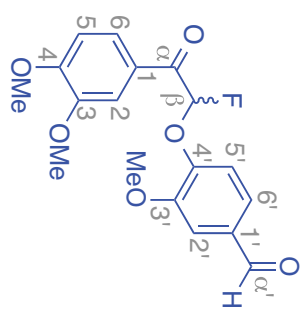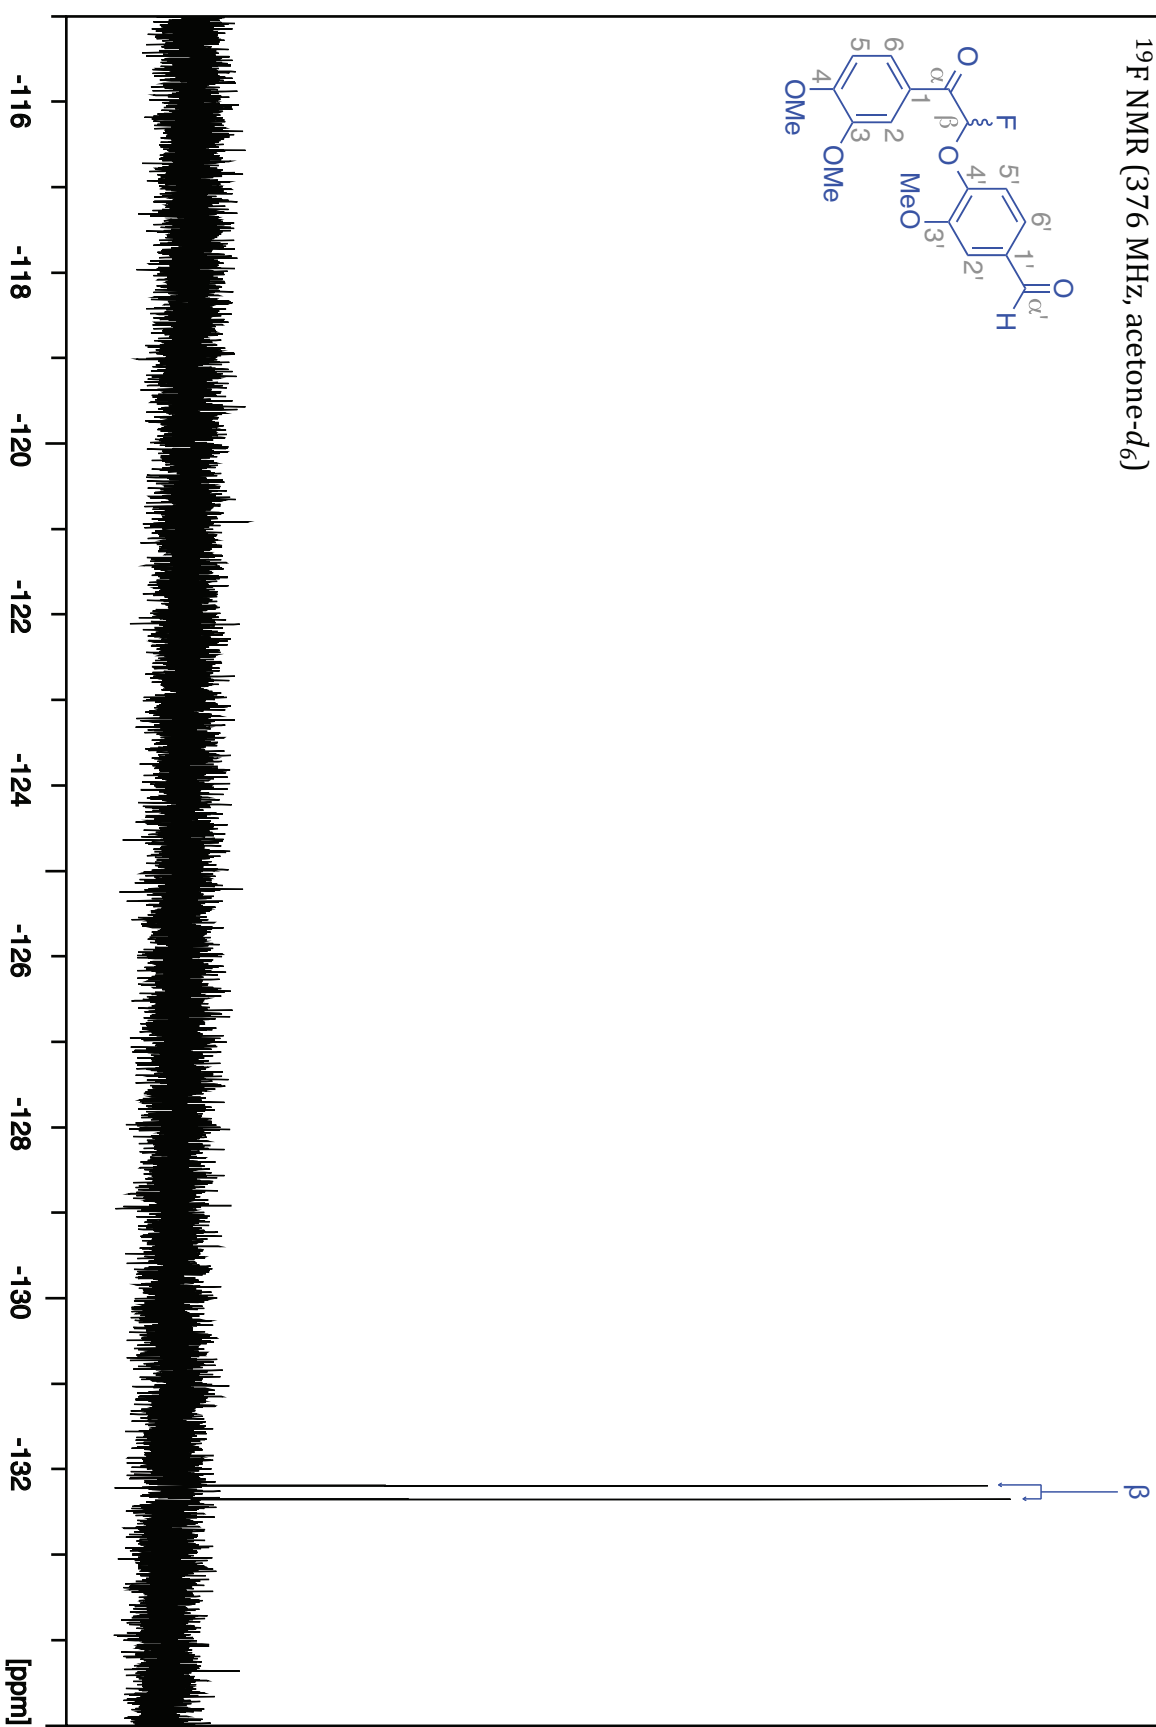

**racem- $\beta$ -fluoro-(1'-formyl-3'-methoxyphenoxy)- $\gamma$ -hydroxypropioveratrone (F-FRHPV)**

$^1\text{H}$  NMR (700 MHz, acetone- $d_6$ )

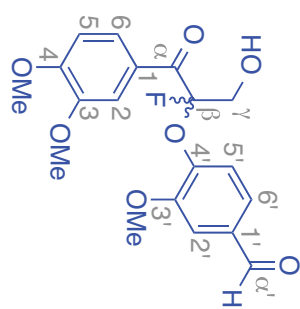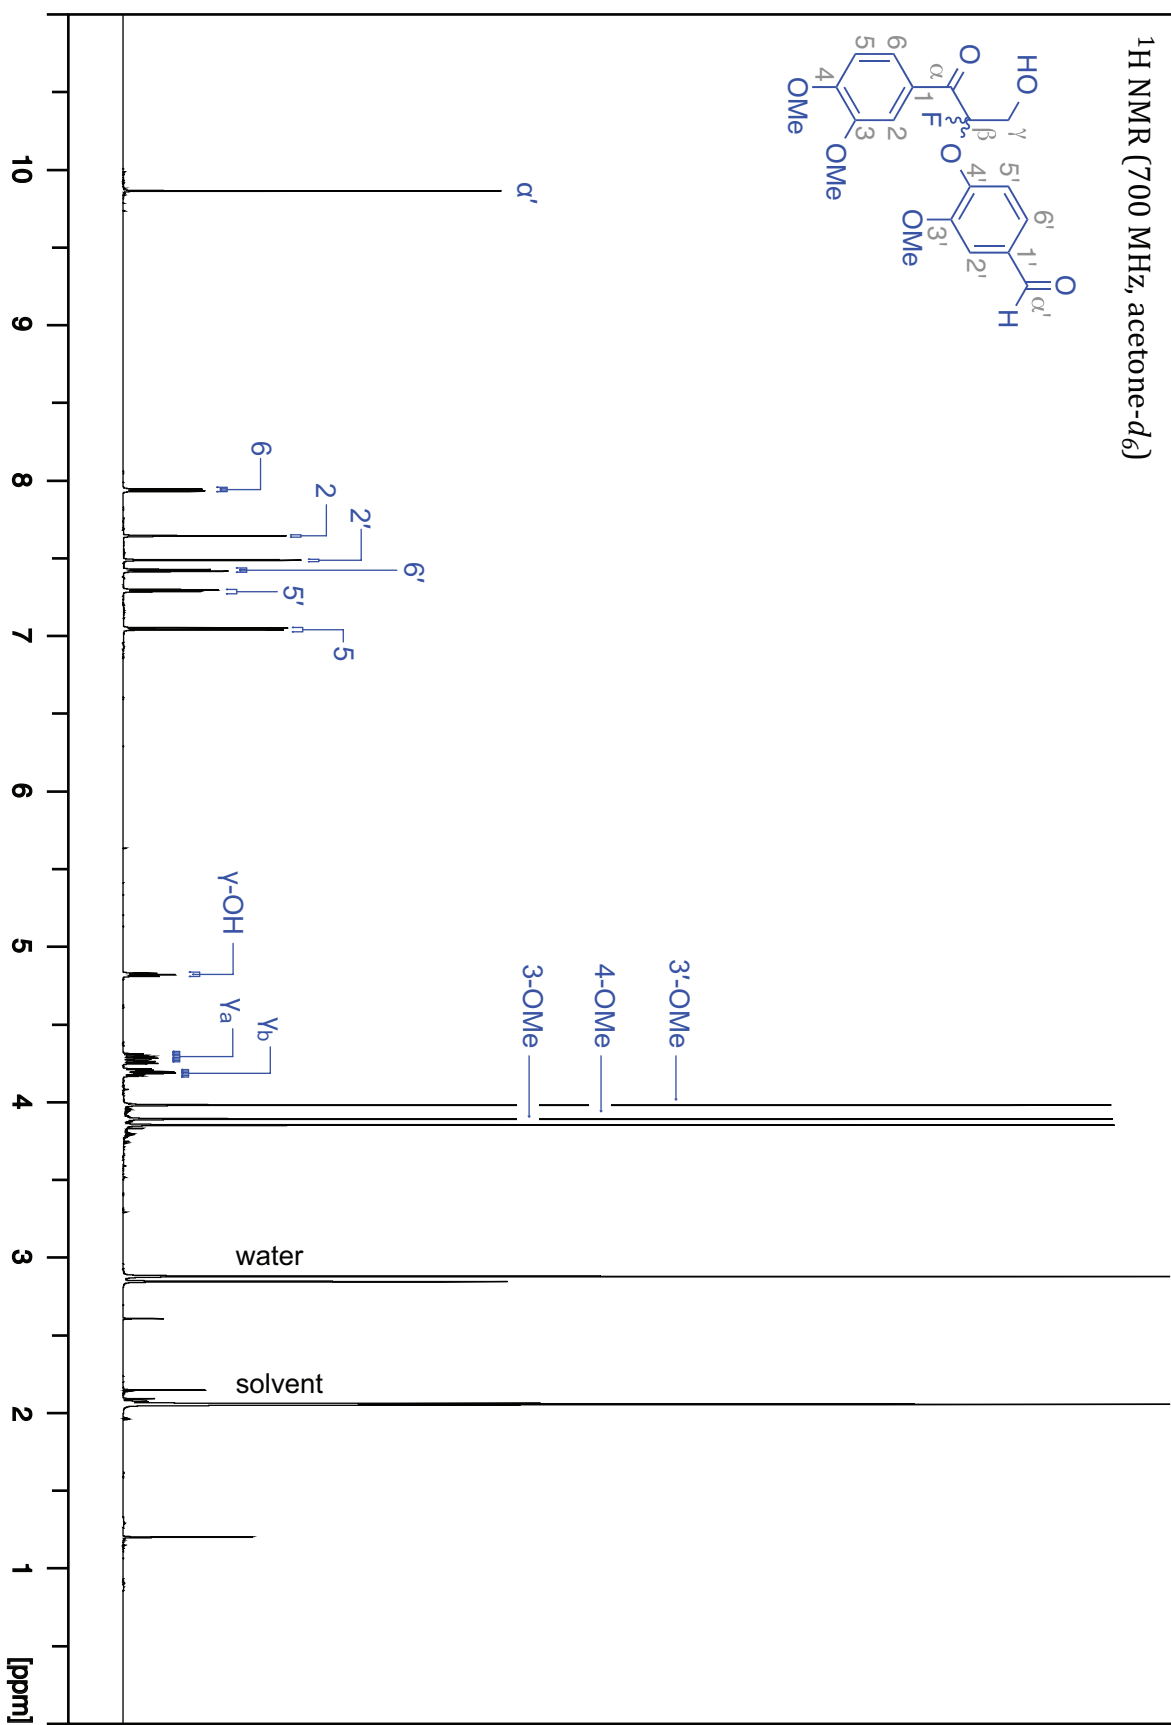

***racem*- $\beta$ -fluoro-(1'-formyl-3'-methoxyphenoxy)- $\gamma$ -hydroxypropioveratrone (F-FPHPV)**

$^{13}\text{C}$  NMR (176 MHz, acetone- $d_6$ )

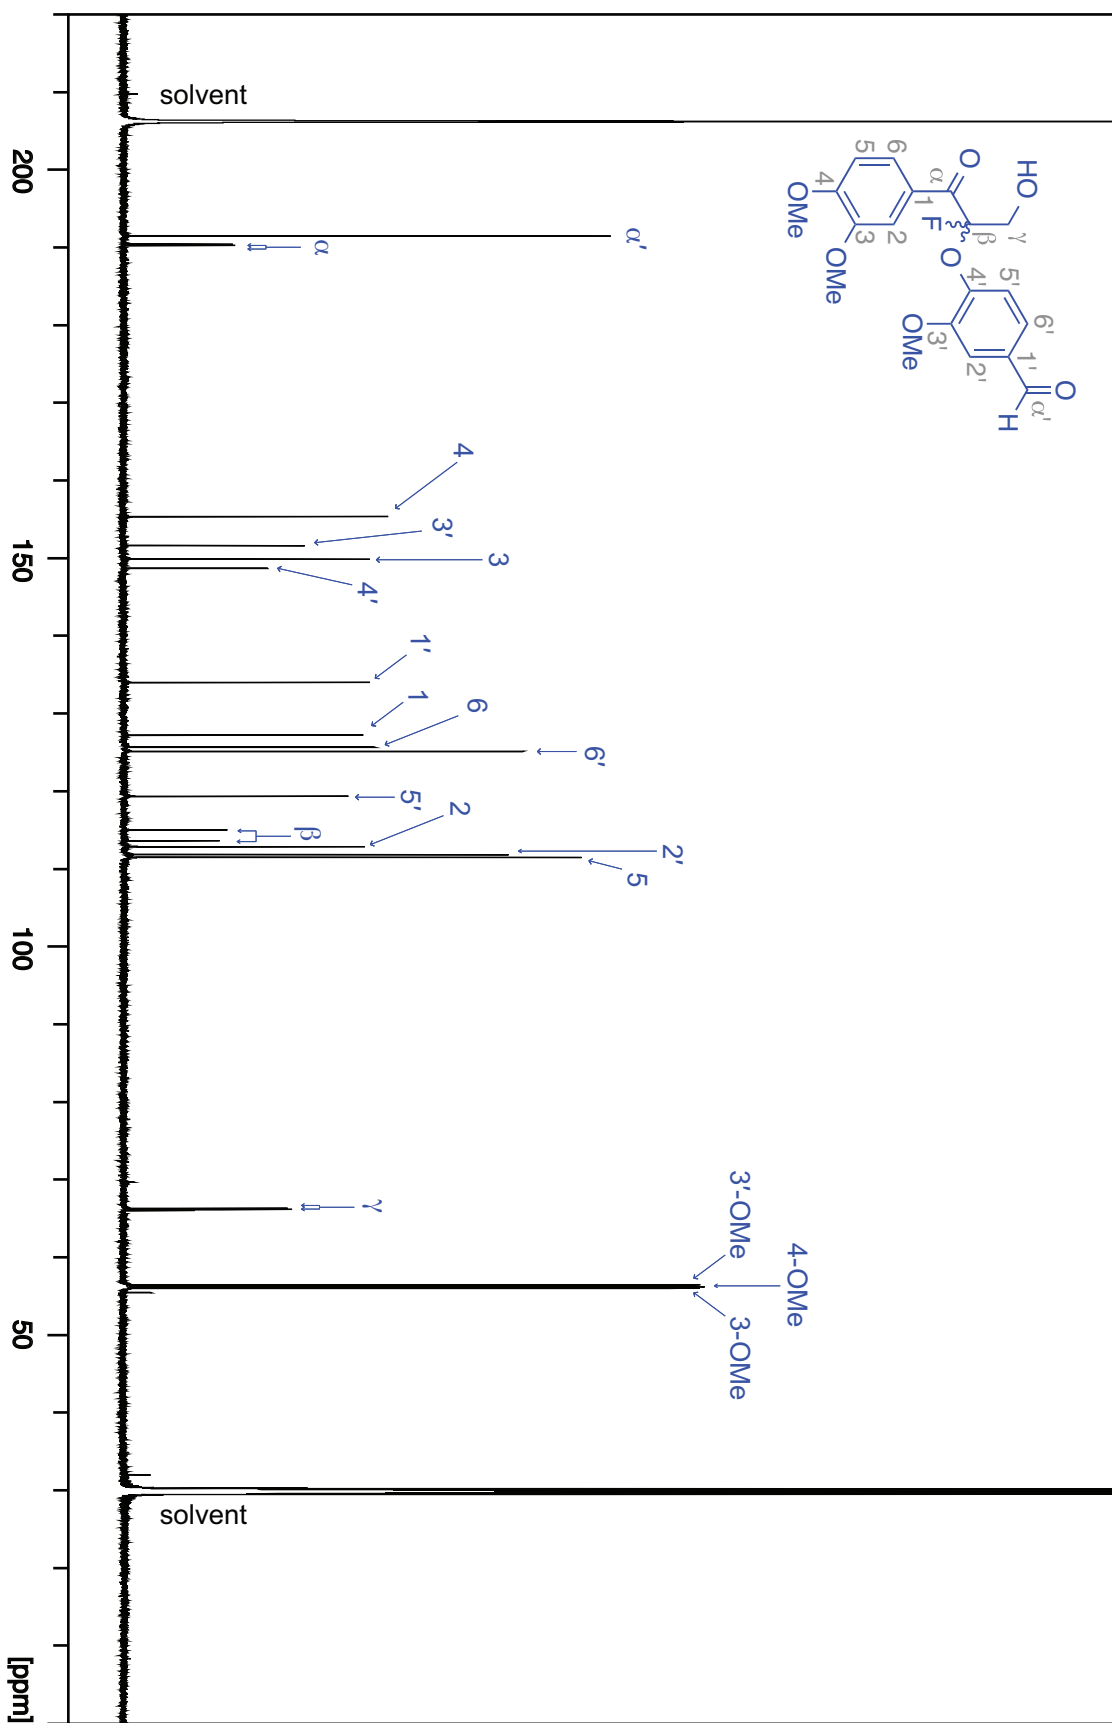

***racem*- $\beta$ -Fluoro-(1'-formyl-3'-methoxyphenoxy)- $\gamma$ -hydroxypropioveratone (F-FRHPV)**

$^{19}\text{F}$  NMR (376 MHz, acetone- $d_6$ )

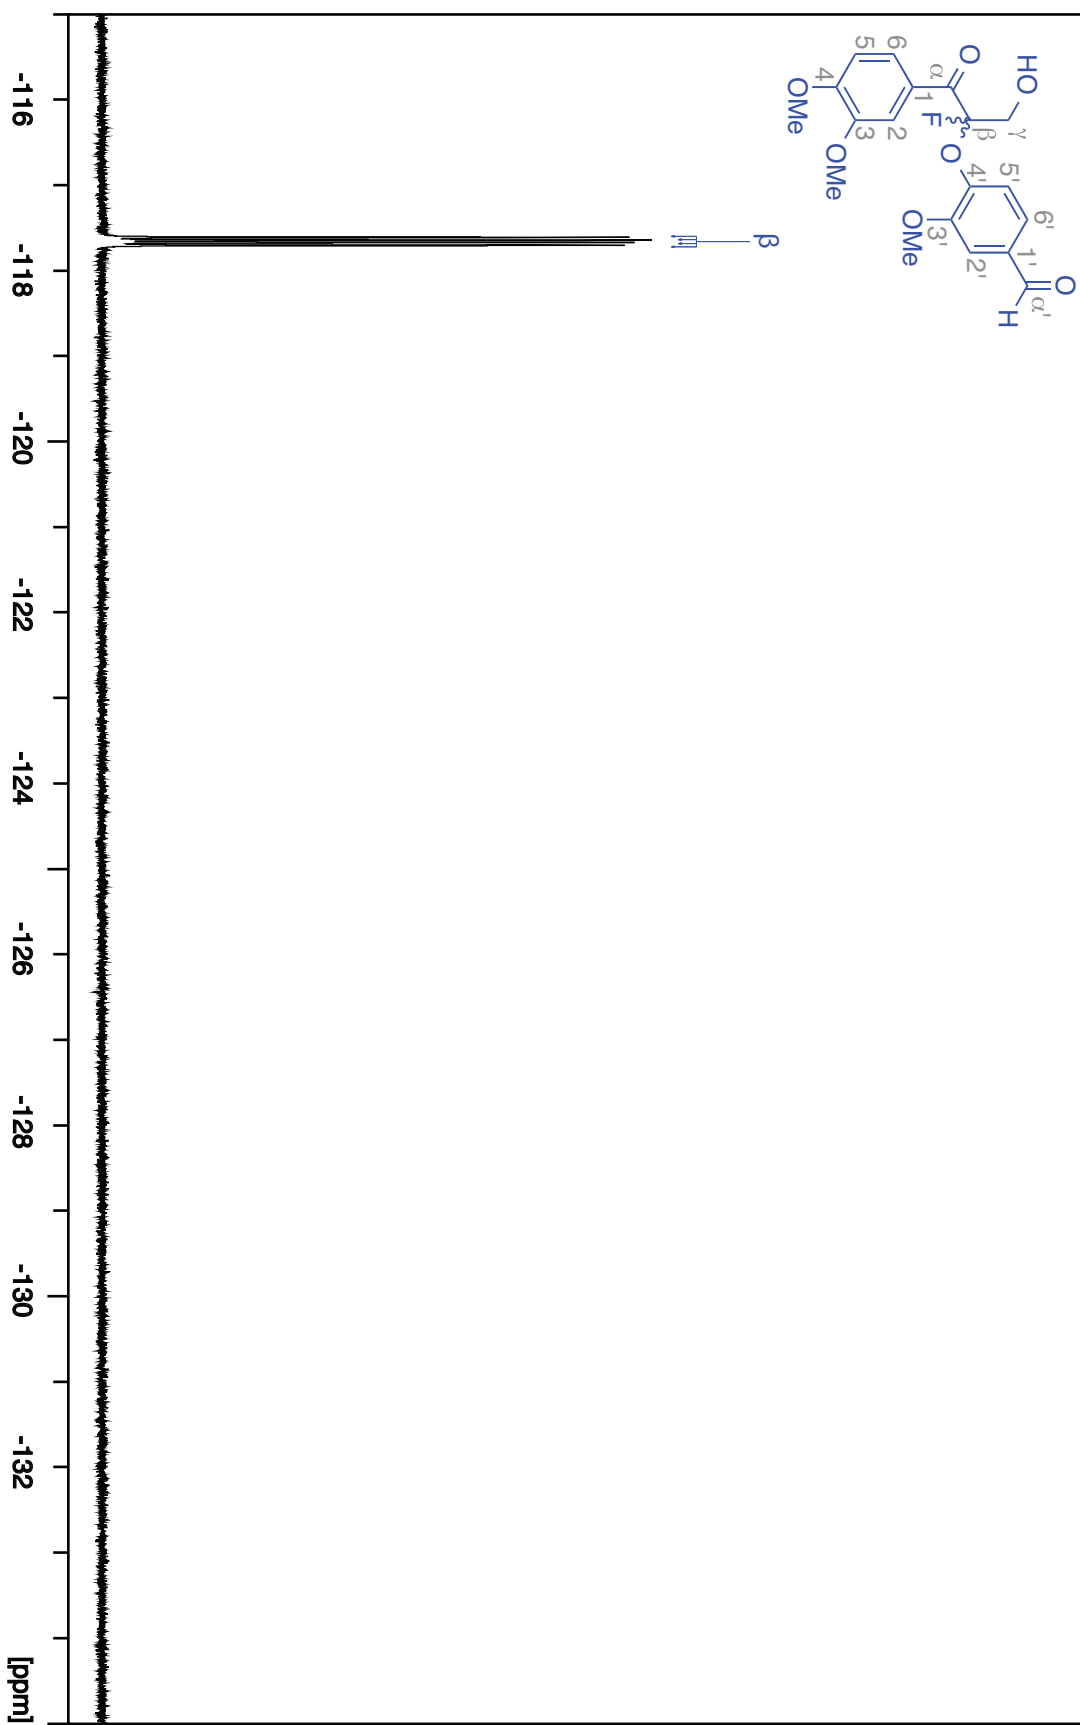

**$\beta$ (S)-fluoro-glutathionyl- $\gamma$ -hydroxy- $\alpha$ -veratrylpropanone ( $\beta$ (S)-F-GS-HVP), from Lige**

$^1\text{H}$  NMR (700 MHz,  $\text{D}_2\text{O}$ )

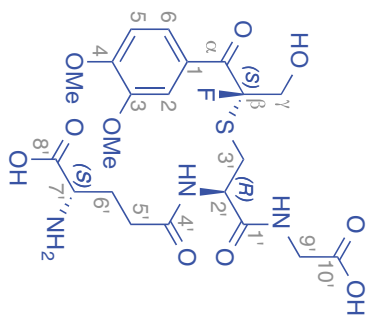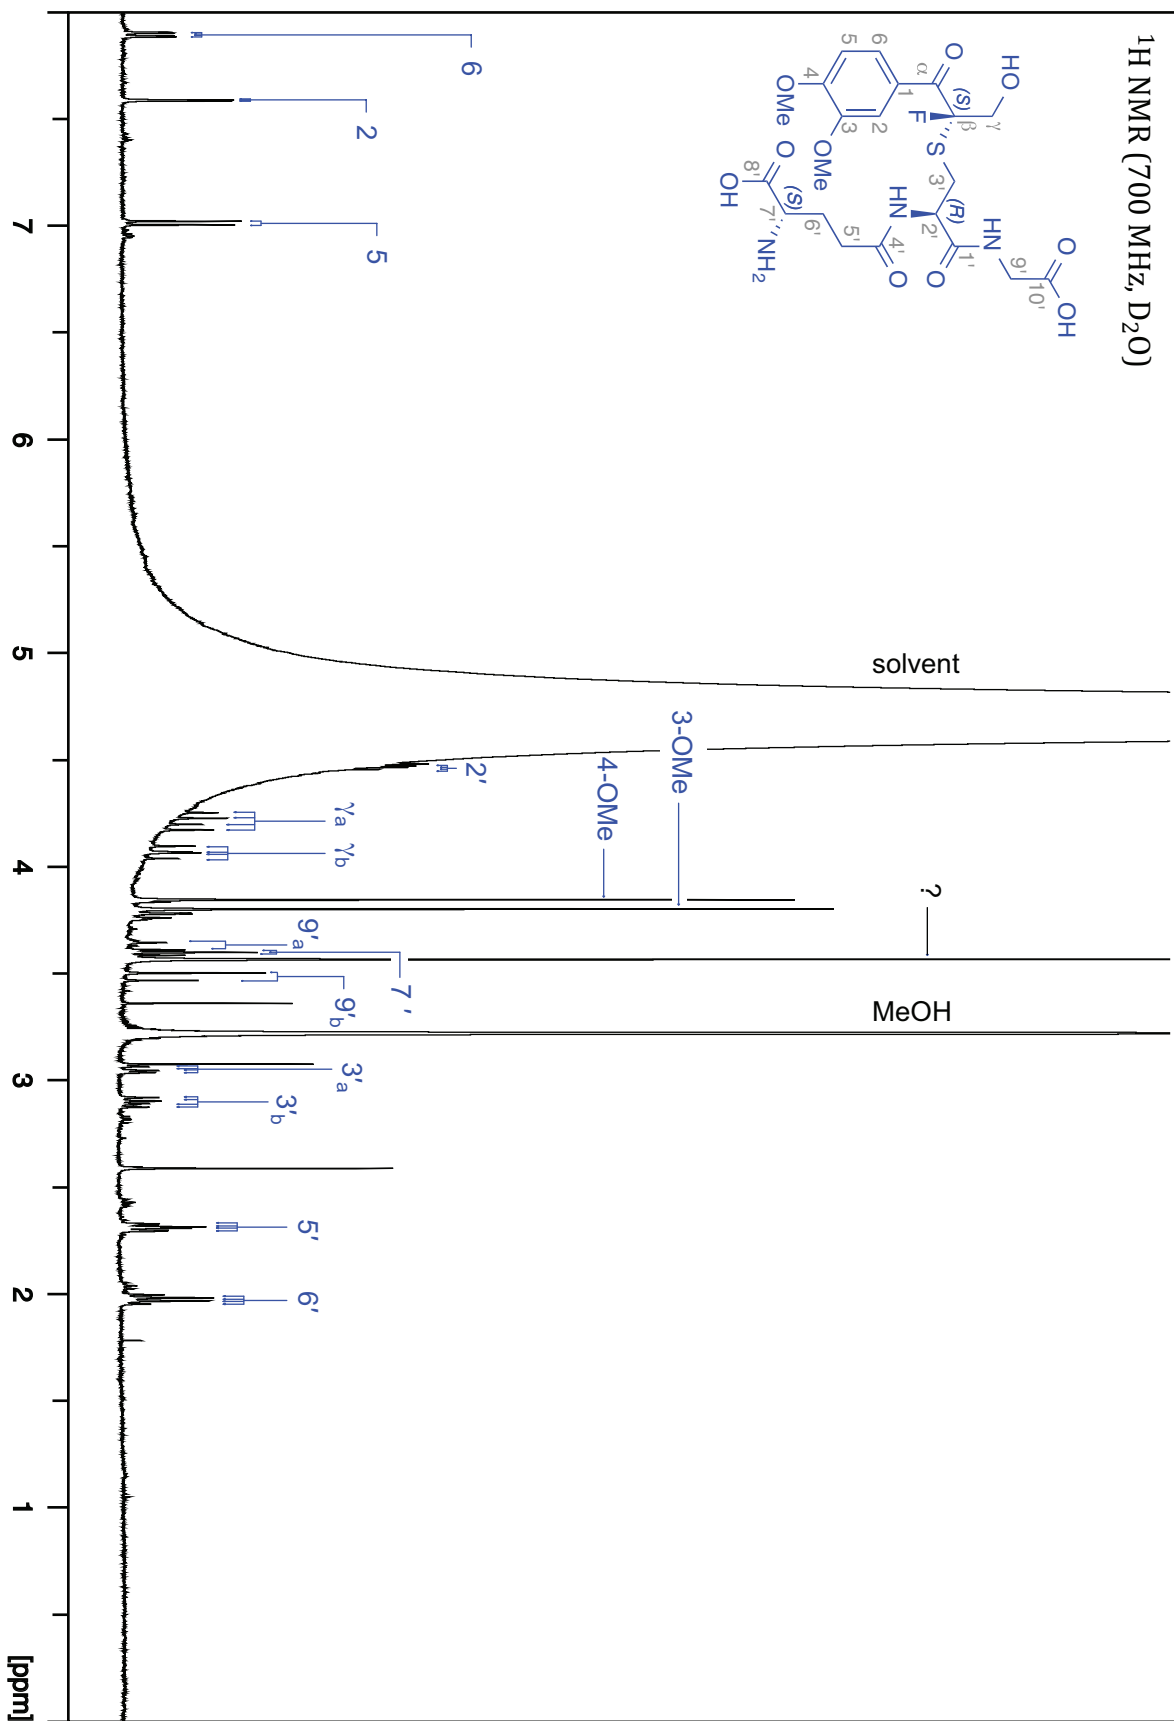



**$\beta$ (S)-glutathionyl- $\gamma$ -hydroxy- $\alpha$ -veratrylpropanone ( $\beta$ (S)-GS-HVP), from LigE**

$^1\text{H}$  NMR (700 MHz,  $\text{D}_2\text{O}$ )

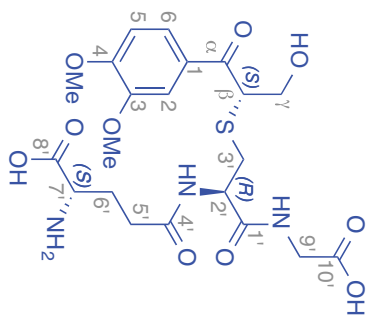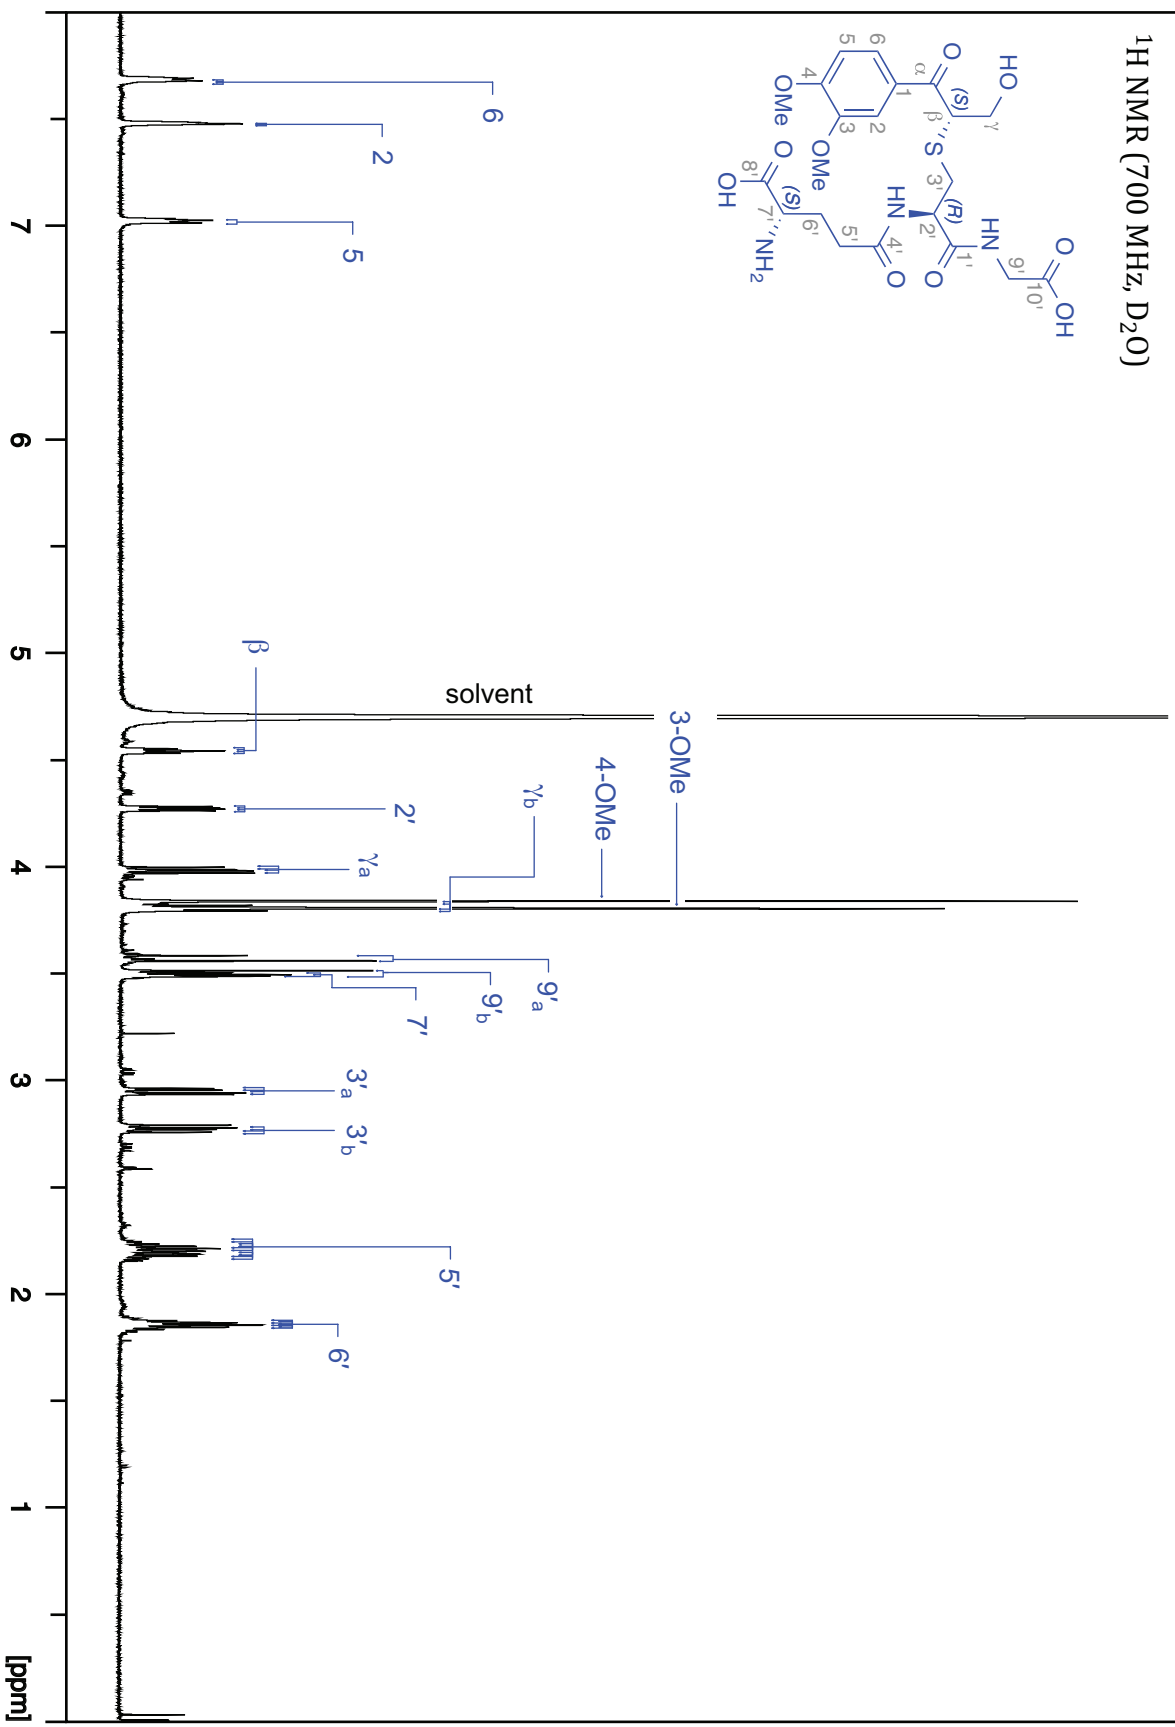

**$\beta$ (S)-glutathionyl- $\gamma$ -hydroxy- $\alpha$ -veratrylpropanone ( $\beta$ (S)-GS-HVP), from Lige**

$^{13}\text{C}$  NMR (176 MHz,  $\text{D}_2\text{O}$ )

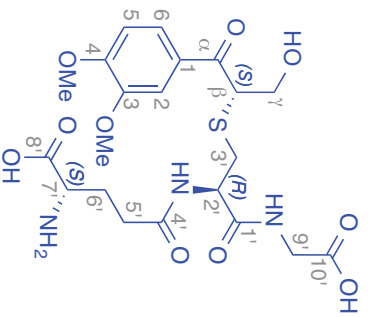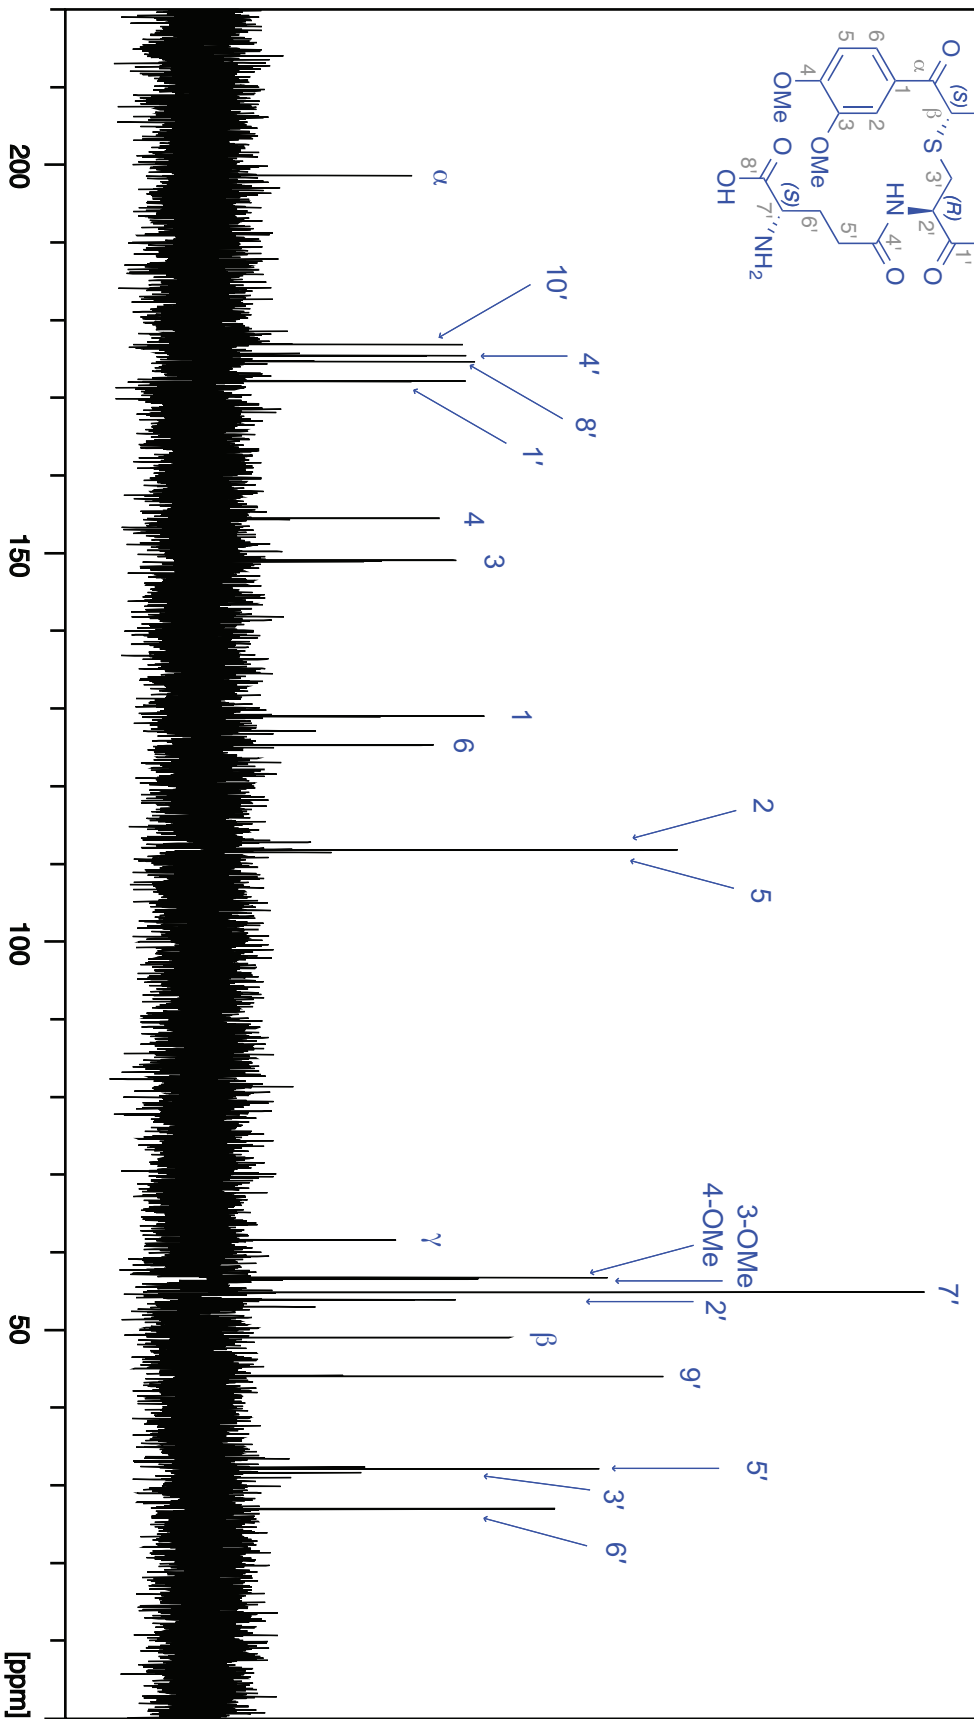

Supplement: 10.1074_M115.694307_jbc.M115.694307-1.pdf [file 10.1074_M115.694307_jbc.M115.694307-1.pdf]
